# Supplementary material for: Cobalt doped β-molybdenum carbide nanoparticles encapsulated within nitrogen-doped carbon for oxygen evolution
Source: Royal Society of Chemistry journal article supplement (doi:10.1039/c9cc04892h), 2019-01-01
Supplement: c9cc04892h1.pdf [file c9cc04892h1.pdf]

**Supporting Information for**  
**Cobalt Doped  $\beta$ -Molybdenum Carbide Nanoparticles**  
**Encapsulated within Nitrogen-Doped Carbon for**  
**Oxygen Evolution**

Xinyang Zhu<sup>a,b</sup>, Xueping Zhang<sup>a,c</sup>, Liang Huang<sup>a,b</sup>, Yongqin Liu<sup>a</sup>, He Zhang<sup>a,b</sup> and Shaojun Dong<sup>\*,a,b</sup>

<sup>a</sup>State Key Laboratory of Electroanalytical Chemistry, Changchun Institute of Applied Chemistry, Chinese Academy of Science, Changchun, Jilin 130022, P. R. China

<sup>b</sup>University of Science and Technology of China, Hefei, Anhui 230026, P. R. China

E-mail: dongsj@ciac.ac.cn.

## Experimental section

### Materials

Zinc nitrate hexahydrate ( $\text{Zn}(\text{NO}_3)_2 \cdot 6\text{H}_2\text{O}$ ) and cobalt nitrate hexahydrate ( $\text{Co}(\text{NO}_3)_2 \cdot 6\text{H}_2\text{O}$ ) were purchased from Xilong Chemical Engineering Co.. 2-methylimidazole was obtained from Aladdin Industrial Co.. Bis(acetylacetonato)dioxomolybdenum (VI) ( $\text{MoO}_2(\text{acac})_2$ ) was bought from Meryer Chemical Technology Co., Ltd.. Methanol and N, N-dimethylformamide (DMF) were purchased from Beijing Chemical Co.. Nafion (5.0 wt%) was purchased from Sigma-Aldrich. In the experiment, all chemical agents were used as received without further purification.

### Synthesis of $\text{Co}_n\text{-}\beta\text{-Mo}_2\text{C@NC}$

*Synthesis of ZIF* ZIF-8 was synthesized following the method previously reported<sup>1</sup>. Three samples with different Co/Zn mole ratios (Co/Zn=0.2, 0.1 and 0.05) were prepared, dubbed as 0.2-ZIF, 0.1-ZIF and 0.05-ZIF, respectively. Typically, 1.68 g  $\text{Zn}(\text{NO}_3)_2 \cdot 6\text{H}_2\text{O}$  were dissolved in 40 mL methanol with 0.32 g, 0.16 g and 0.08 g  $\text{Co}(\text{NO}_3)_2 \cdot 6\text{H}_2\text{O}$  at room temperature, respectively. 3.7 g 2-methylimidazole were dissolved in 40 mL methanol at room temperature, respectively. Then the mixture solution of  $\text{Zn}(\text{NO}_3)_2 \cdot 6\text{H}_2\text{O}$  and  $\text{Co}(\text{NO}_3)_2 \cdot 6\text{H}_2\text{O}$  was poured into methanol solution of 2-methylimidazole under vigorous stirring for 24 h, respectively. The reaction products were collected through centrifugation, and washed by methanol for three times, then dried at 60 °C for 12 h. Morphology of the ZIFs was shown in the Fig.S1.

*Synthesis of  $\text{Co}_n\text{-}\beta\text{-Mo}_2\text{C@NC}$*  Firstly, 0.02 g  $\text{MoO}_2(\text{acac})_2$  were dissolved in 200  $\mu\text{L}$  DMF, respectively. Afterwards, 80 mg 0.2-ZIF, 0.1-ZIF and 0.05-ZIF were obtained, keeping in three 5 mL volume centrifuge tubes. DMF solution of  $\text{MoO}_2(\text{acac})_2$  was dropped into the three centrifuge tubes, respectively, then the mixtures were vibrated with mixer for 5 minutes. After that, mixtures were put into vacuum drying oven at 60 °C for 12 h. Subsequently, dried products were ground to fine powder and put into porcelain boats, which were then calcinated at 900 °C for 3 h with a heating rate of 3 °C  $\text{min}^{-1}$  in  $\text{N}_2$  atmosphere. The samples as-obtained were

dubbed as Co<sub>n</sub>-β-Mo<sub>2</sub>C@NC.

### **Characterization**

X-ray diffraction (XRD) data were obtained from a D8 ADVANCE (Bruker, Germany) X-ray diffractometer with Cu K $\alpha$  radiation ( $\lambda = 1.5406 \text{ \AA}$ ). Scanning electron microscopy (SEM) measurements were carried out on a PHILIPS XL-30 field-emission scanning electron microscope with an accelerating voltage of 10 kV. Transmission electron microscopy (TEM) experiments were performed on a TECNAI F20 field-emission transmission electron microscope with an accelerating voltage of 200 kV. X-ray photoelectron spectra (XPS) were acquired on an ESCALAB-MKII X-ray photoelectron spectrometer with an excitation source of Al K $\alpha$  radiation. Raman spectra were recorded on a LabRAM HR800 confocal Raman microscope (Horiba Jobin Yvon) with a laser excitation of 633 nm and power of 5 %. Nitrogen adsorption/desorption analysis was performed at 77.15 K on the AutosorbStation1 (Quantachrome, USA). Before measurement, the samples were degassed at 150 °C under vacuum for 12 h.

### **Electrochemical measurements**

The OER measurements were performed in a three-electrodes system on a CHI832c electrochemical workstation with a Model RRDE-3A Apparatus (BAS Japan) at room temperature. A Pt wire and Ag/AgCl (saturated KCl) electrodes were used as counter electrode and reference electrode, respectively. To prepare working electrode, 2 mg sample was dissolved 1 mL in ethanol containing 0.12 wt.% Nafion solution under sonication. After that, 18  $\mu\text{L}$  of the mixture was dropped onto the glassy carbon of RDE with a diameter of 4 mm, then left it dry in air. The catalyst loading amount was about 0.28 mg/cm<sup>2</sup> on the working electrode surface. Linear sweep voltammetry (LSV) experiments were performed at a scan rate of 5 mV/s and a rotating speed of 1600 rpm with a correction of 95% iR-compensation in 1.0 M KOH solution which was purged with O<sub>2</sub> for 15 minutes. The potential measured versus Ag/AgCl (saturated KCl) electrode was converted to versus reversible hydrogen electrode (RHE) according to  $E_{vs.RHE} = E_{vs.Ag/AgCl} + E_{Ag/AgCl}^{\ominus} + 0.0592pH_2$ . The overpotential ( $\eta$ ) of the reaction can be obtained according to  $\eta = E_{vs.RHE} - 1.23 \text{ V}$ . Current density (J) was normalized to the

geometrical area of RDE. Electrochemical impedance spectroscopy (EIS) measurements were performed at an overpotential of 600 mV vs. RHE from 1 MHz to 0.1 Hz with an amplitude of 5 mV.

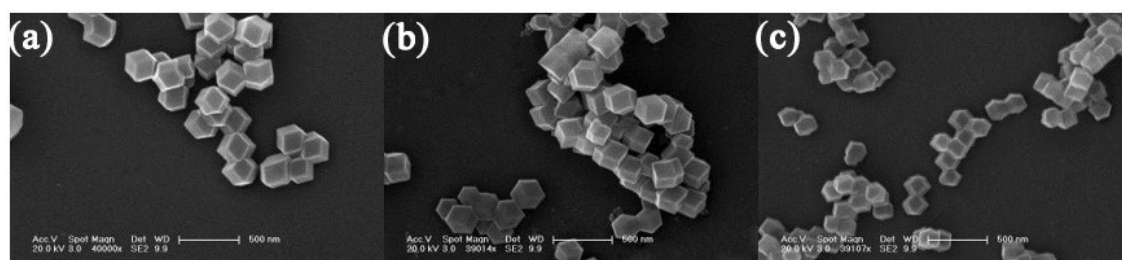

**Figure. S1** Scanning electron microscopy (SEM) images of bimetallic ZIFs with different Zn/Co mole ratios, (a) 5:1, (b) 10:1, (c) 20:1.

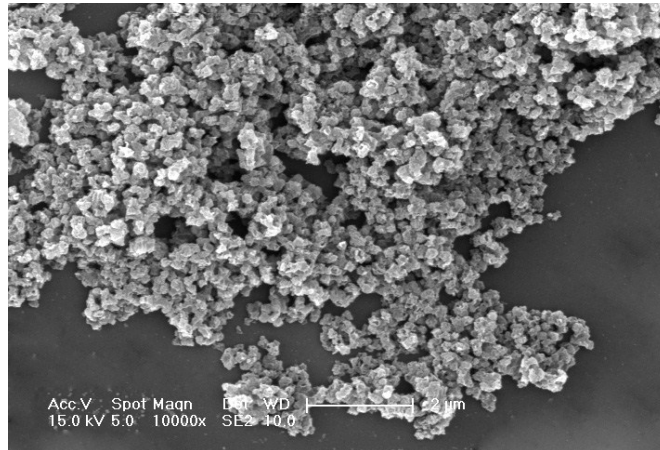

**Figure. S2** Scanning electron microscopy (SEM) image of  $\text{Co}_{0.1}\text{-}\beta\text{-Mo}_2\text{C@NC}$ .

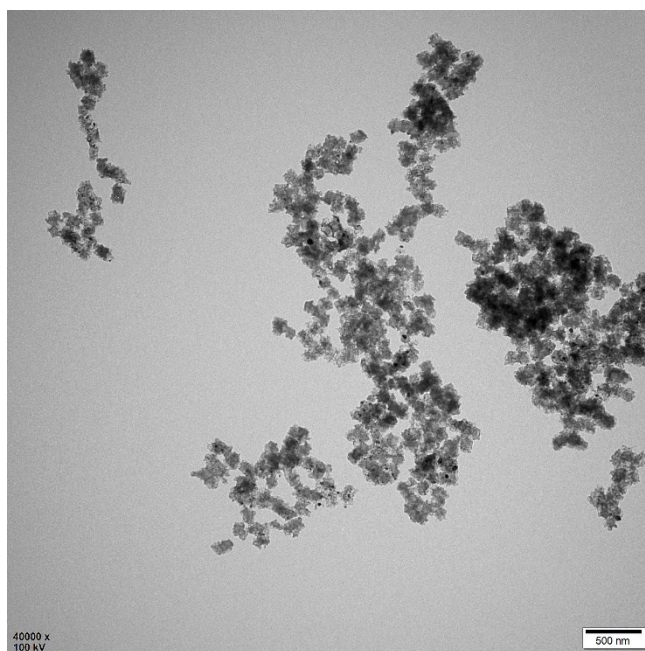

**Figure. S3** Low magnification TEM image of  $\text{Co}_{0.1}\text{-}\beta\text{-Mo}_2\text{C@NC}$ .

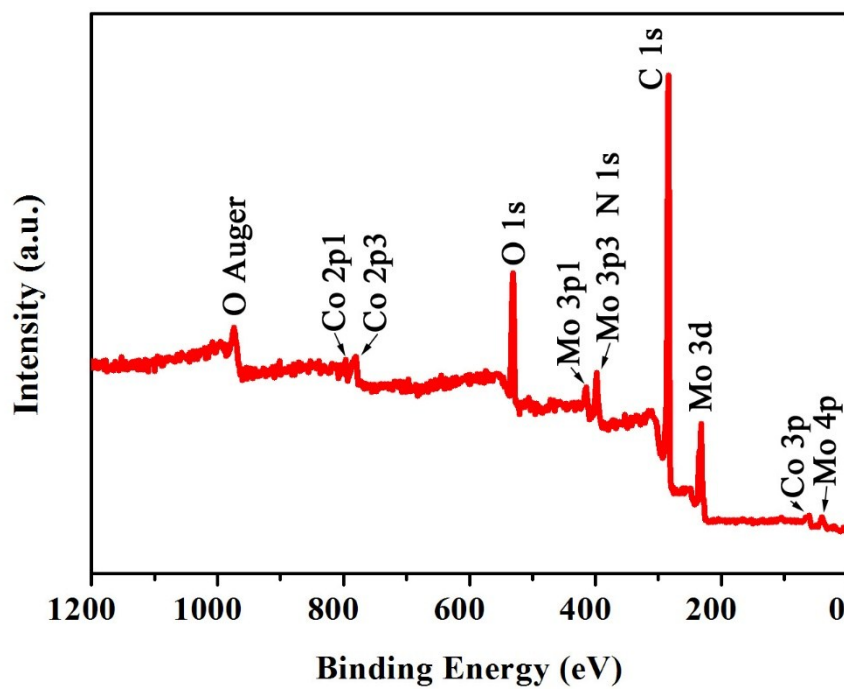

**Figure. S4** XPS survey spectrum of  $\text{Co}_{0.1}\text{-}\beta\text{-Mo}_2\text{C@NC}$ .



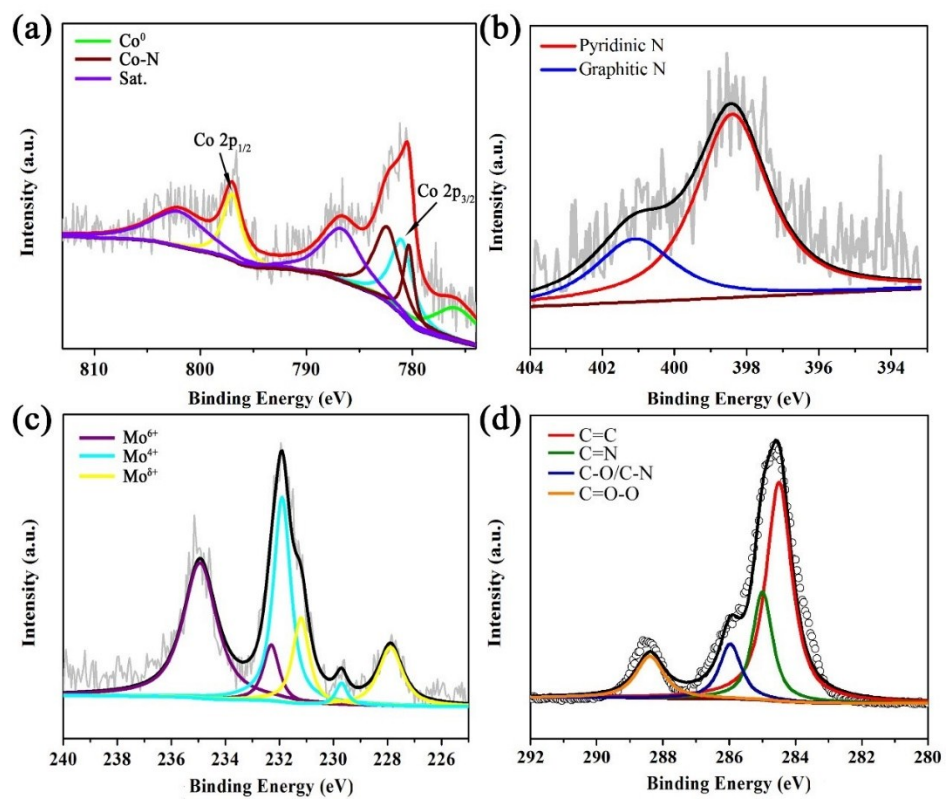

**Figure. S5** XPS spectra of  $\text{Co}_{0.1}\text{-}\beta\text{-Mo}_2\text{C@NC}$ , (a) Co, (b) N, (c) Mo and (d) C.

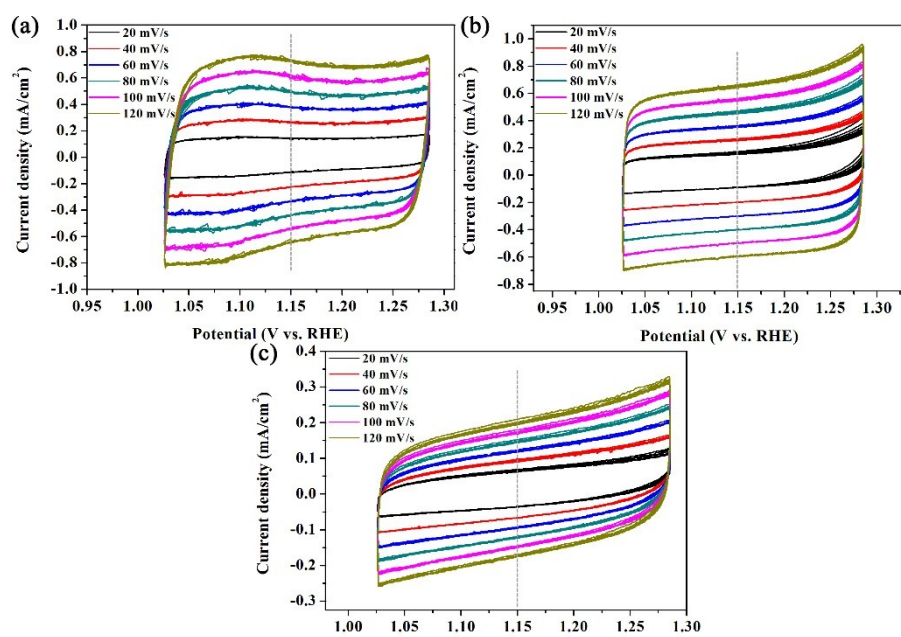

**Figure. S6** Cyclic voltammograms of (a)  $\text{Co}_{0.2}\text{-}\beta\text{-Mo}_2\text{C@NC}$ , (b)  $\text{Co}_{0.1}\text{-}\beta\text{-Mo}_2\text{C@NC}$ , (c)  $\text{Co}_{0.05}\text{-}\beta\text{-Mo}_2\text{C@NC}$  with various scan rates in 1.0 M KOH.

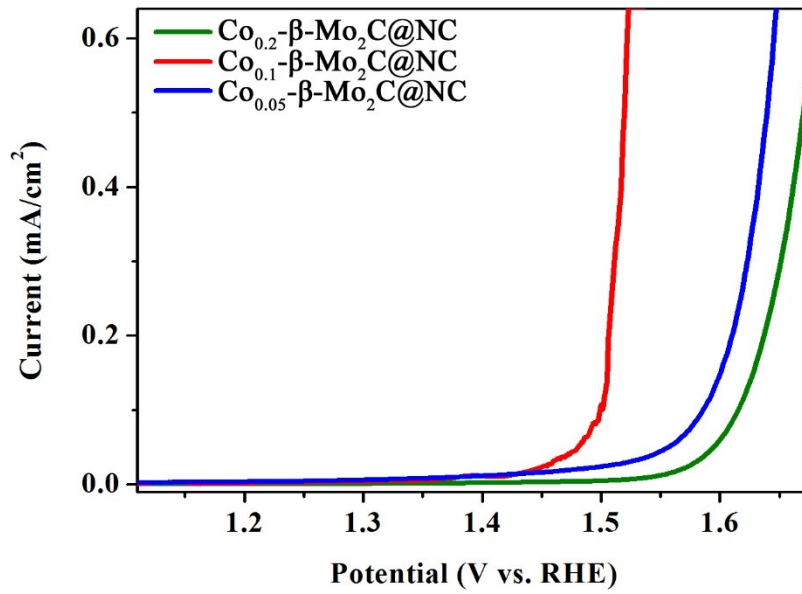

**Figure. S7** The specific OER activity calculated by normalizing the current based on the corresponding ECSA of Co<sub>n</sub>-β-Mo<sub>2</sub>C@NC in 1 M KOH.

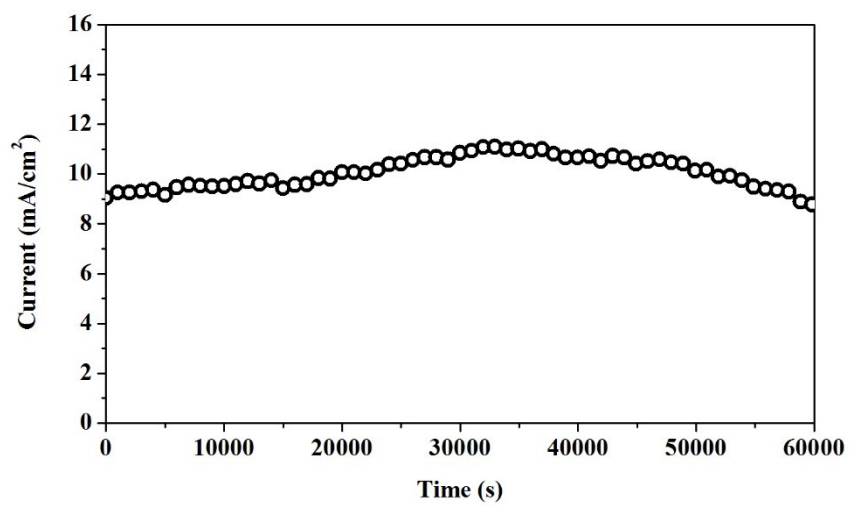

**Figure. S8** I-t plot of  $\text{Co}_{0.1}\text{-}\beta\text{-Mo}_2\text{C@NC}$  at a controlled potential of 1.49

V.

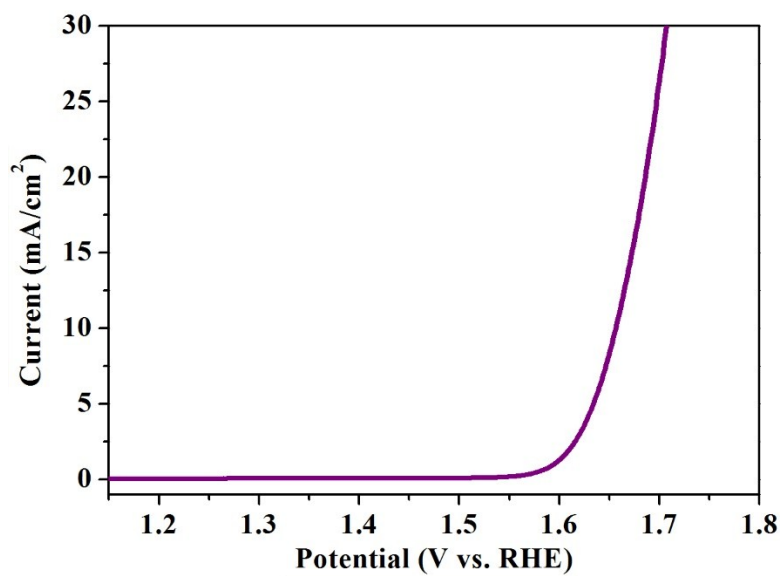

**Figure. S9** LSV curves of Co<sub>0.1</sub>@NC after iR-compensation in 1 M KOH aqueous solution at a scan rate of 5 mV/s and a rotating speed of 1600 rpm.

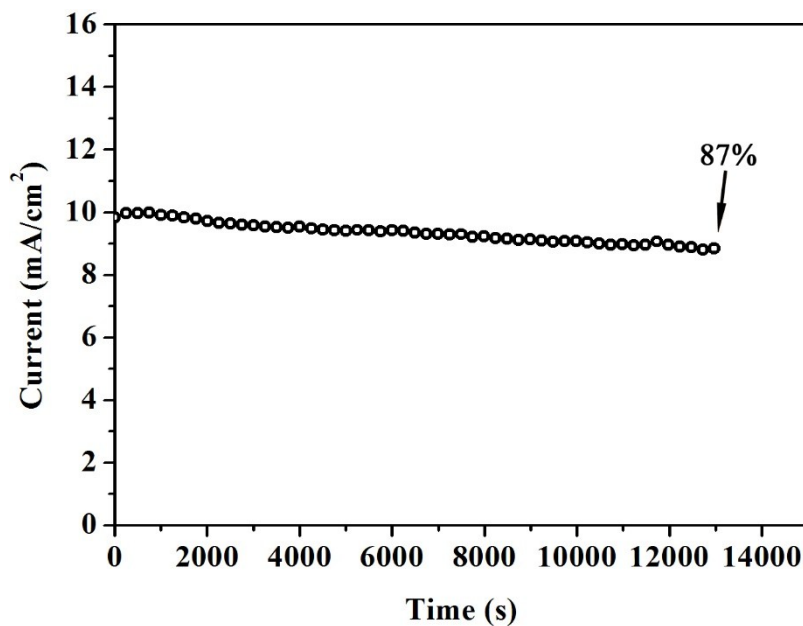

**Figure. S10** I-t plot of  $\text{Co}_{0.1}\text{@NC}$  (without  $\beta\text{-Mo}_2\text{C}$ ) at a controlled potential of 1.65 V.

As a comparison, the OER performance of the sample without  $\beta\text{-Mo}_2\text{C}$  (dubbed as  $\text{Co}_{0.1}\text{@NC}$ ) was tested in the same condition, shown in Figure S9, revealing an OER overpotential ( $\eta_{10}$ ) of 420 mV.  $\text{Co}_{0.1}\text{@NC}$  was tested for its long-term stability at 1.65 V, aiming to prove the stability brought by the existence of  $\beta\text{-Mo}_2\text{C}$ . As shown in Figure S10, after mere 3.6 h chronoamperometry test, the current value dropped to 87% of the initial current accompanied with a continuous decline trend, demonstrating the contribution of  $\beta\text{-Mo}_2\text{C}$  towards the long-term stability of the electrocatalyst.

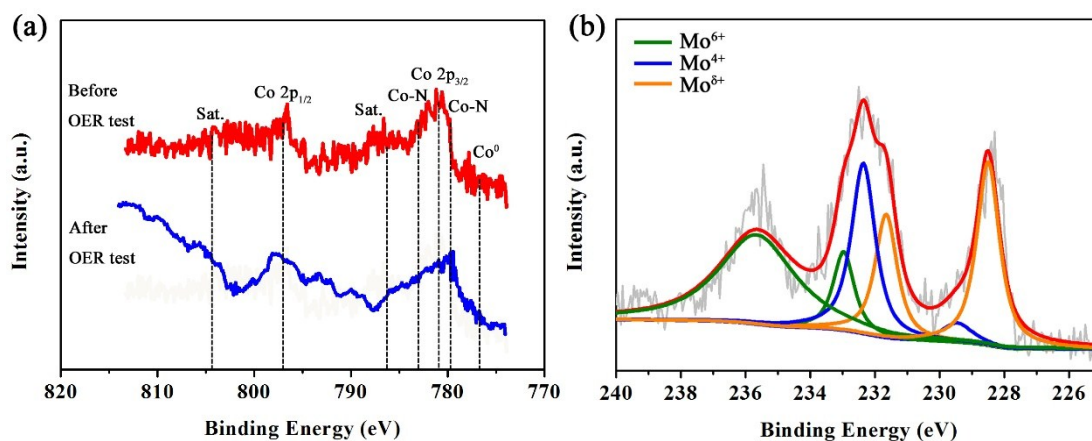

**Figure. S11** XPS spectrum of  $\text{Co}_{0.1}\text{-}\beta\text{-Mo}_2\text{C@NC}$  after OER test, (a) Co and (b) Mo.

Furthermore, the XPS measurement was utilized to observe the variation of the  $\text{Co}_{0.1}\text{-}\beta\text{-Mo}_2\text{C@NC}$  after stability test. The peaks of Co-N and Co did not change in Co XPS spectrum, revealing the stability of the catalyst during the OER process (Figure S11 a)<sup>3</sup>. The Mo peaks of the catalyst demonstrated a phenomena of higher binding energy compared to that before test. There have been similar reports before, but the mechanism is still unknown<sup>3, 4</sup>, as shown in Figure S11b and Table S3.

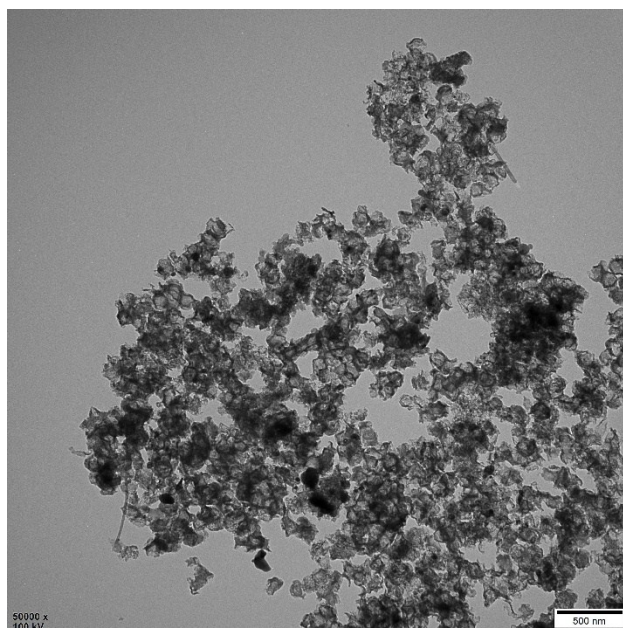

**Figure. S12** TEM image of the  $\text{Co}_{0.1}\text{-}\beta\text{-Mo}_2\text{C@NC}$  after I-t test.



**Table S1.** Cobalt element contents (wt%) of different samples analyzed by ICP-AES.

| Sample                                             | Co/ICP (wt%) | Mo/ICP (wt%) |
|----------------------------------------------------|--------------|--------------|
| Co <sub>0.2</sub> - $\beta$ -Mo <sub>2</sub> C@NC  | 3.91         | 10.89        |
| Co <sub>0.1</sub> - $\beta$ -Mo <sub>2</sub> C@NC  | 2.59         | 10.61        |
| Co <sub>0.05</sub> - $\beta$ -Mo <sub>2</sub> C@NC | 1.59         | 10.54        |

Calcination step under N<sub>2</sub> atmosphere ensured the formation of  $\beta$ -Mo<sub>2</sub>C nanoparticles, which is the effectively catalytical key factor and the complete carbonization of the carbon matrix. Moreover, cobalt content of these samples analyzed by inductively coupled plasma atomic emission spectroscopy (ICP-AES) were 3.91 wt%, 2.59 wt% and 1.59 wt%, respectively (Table S1), which indicated very low cobalt contents in materials, consisting with the XRD analysis and the theme of doping. While the exact content of Mo<sub>2</sub>C were 5.45 wt%, 5.31 wt% and 5.27 wt%, according to ICP-AES results of Mo in these samples (10.89 wt%, 10.61 wt% and 10.54 wt%).

**Table S2.** Comparison of OER activity of various electrocatalysts.

| Electrocatalyst                                               | Support                  | $\eta$ at 10<br>mA/cm <sup>2</sup><br>(mV) | Electrolyte          | Reference        |
|---------------------------------------------------------------|--------------------------|--------------------------------------------|----------------------|------------------|
| <b>Co<sub>0.1</sub>-<math>\beta</math>-Mo<sub>2</sub>C@NC</b> | <b>Glassy<br/>carbon</b> | <b>262.2</b>                               | <b>1.0 M<br/>KOH</b> | <b>This work</b> |
| Co-Mo <sub>2</sub> C NPs                                      | Glassy<br>carbon         | 347                                        | 0.1 M<br>KOH         | 5                |
| Co-Mo <sub>2</sub> C@NCNT                                     | Glassy<br>carbon         | 377                                        | 1.0 M<br>KOH         | 6                |
| Ni/Mo <sub>2</sub> C-NCNFs                                    | Glassy<br>carbon         | 288                                        | 1.0 M<br>KOH         | 7                |
| Ni/Mo <sub>2</sub> C-PC                                       | Glassy<br>carbon         | 368                                        | 1.0 M<br>KOH         | 8                |
| Co-NC@Mo <sub>2</sub> C                                       | Glassy<br>carbon         | 347                                        | 1.0 M<br>KOH         | 9                |
| Co/ $\beta$ -Mo <sub>2</sub> C@N-<br>CNTs                     | Glassy<br>carbon         | 246                                        | 1.0 M<br>KOH         | 3                |
| NiCo/Fe <sub>3</sub> O <sub>4</sub> /MOF-<br>74               | Glassy<br>carbon         | 238                                        | 1.0 M<br>KOH         | 10               |
| Co <sub>3</sub> O <sub>4</sub> nanosheets                     | Ti foil                  | 300                                        | 0.1 M<br>KOH         | 11               |

|                                    |                  |     |              |    |
|------------------------------------|------------------|-----|--------------|----|
| CoNi(OH) <sub>x</sub><br>nanotubes | Cu foil          | 280 | 1.0 M<br>KOH | 12 |
| NiCoFeB<br>nanochains              | Glassy<br>carbon | 284 | 1.0 M<br>KOH | 13 |

**Table S3.** Comparison of the High-resolution Mo 3d XPS spectra of  $\text{Co}_{0.1}\text{-}\beta\text{-Mo}_2\text{C@NC}$  before and after cyclic test.

| Sample                                                              | Mo                             |                     |         |                |
|---------------------------------------------------------------------|--------------------------------|---------------------|---------|----------------|
|                                                                     |                                | Binding Energy (eV) | Area    | Percentage (%) |
| $\text{Co}_{0.1}\text{-}\beta\text{-Mo}_2\text{C@NC}$<br>before OER | $\text{Mo}^{\delta+} 3d_{5/2}$ | 227.90              | 914.58  | 16.37          |
|                                                                     | $\text{Mo}^{4+} 3d_{5/2}$      | 229.70              | 426.51  | 7.63           |
|                                                                     | $\text{Mo}^{\delta+} 3d_{3/2}$ | 231.20              | 790.74  | 14.15          |
|                                                                     | $\text{Mo}^{4+} 3d_{3/2}$      | 231.90              | 1155.53 | 20.68          |
|                                                                     | $\text{Mo}^{6+} 3d_{5/2}$      | 232.30              | 686.34  | 12.28          |
|                                                                     | $\text{Mo}^{6+} 3d_{3/2}$      | 234.95              | 1613.93 | 28.88          |
| $\text{Co}_{0.1}\text{-}\beta\text{-Mo}_2\text{C@NC}$<br>after OER  | $\text{Mo}^{\delta+} 3d_{5/2}$ | 228.50              | 1174.91 | 9.84           |
|                                                                     | $\text{Mo}^{4+} 3d_{3/2}$      | 229.50              | 1028.70 | 8.62           |
|                                                                     | $\text{Mo}^{\delta+} 3d_{5/2}$ | 231.65              | 2360.03 | 19.77          |
|                                                                     | $\text{Mo}^{4+} 3d_{3/2}$      | 232.35              | 2267.34 | 18.99          |
|                                                                     | $\text{Mo}^{6+} 3d_{5/2}$      | 232.95              | 1342.18 | 11.24          |
|                                                                     | $\text{Mo}^{6+} 3d_{3/2}$      | 235.70              | 3763.86 | 31.53          |

## Reference:

1. Y. Z. Chen, C. Wang, Z. Y. Wu, Y. Xiong, Q. Xu, S. H. Yu and H. L. Jiang, *Adv. Mater.*, 2015, **27**, 5010-5016.
2. L. Huang, X. Zhang, Q. Wang, Y. Han, Y. Fang and S. Dong, *J. Am. Chem. Soc.*, 2018, **140**, 1142-1147.
3. T. Ouyang, Y. Q. Ye, C. Y. Wu, K. Xiao and Z. Q. Liu, *Angew. Chem., Int. Ed.*, 2019, **58**, 4923-4928.
4. J. Wang, F. Xu, H. Jin, Y. Chen and Y. Wang, *Adv. Mater.*, 2017, **29**, 1605838.
5. M. Kim, S. Kim, D. Song, S. Oh, K. J. Chang and E. Cho, *Appl. Catal., B*, 2018, **227**, 340-348.
6. L. Ai, J. Su, M. Wang and J. Jiang, *ACS Sustainable Chem. Eng.*, 2018, **6**, 9912-9920.
7. M. X. Li, Y. Zhu, H. Y. Wang, C. Wang, N. Pinna and X. F. Lu, *Adv. Energy Mater.*, 2019, **9**, 1803185.
8. Z. Y. Yu, Y. Duan, M. R. Gao, C. C. Lang, Y. R. Zheng and S. H. Yu, *Chem. Sci.*, 2017, **8**, 968-973.
9. Q. Liang, H. Jin, Z. Wang, Y. Xiong, S. Yuan, X. Zeng, D. He and S. Mu, *Nano Energy*, 2019, **57**, 746-752.
10. X. Wang, H. Xiao, A. Li, Z. Li, S. Liu, Q. Zhang, Y. Gong, L. Zheng, Y. Zhu, C. Chen, D. Wang, Q. Peng, L. Gu, X. Han, J. Li and Y. Li, *J. Am. Chem. Soc.*, 2018, **140**, 15336-15341.
11. L. Xu, Q. Jiang, Z. Xiao, X. Li, J. Huo, S. Wang and L. Dai, *Angew. Chem., Int. Ed.*, 2016, **55**, 5277-5281.
12. S. W. Li, Y. C. Wang, S. J. Peng, L. J. Zhang, A. M. Al-Enizi, H. Zhang, X. H. Sun and G. F. Zheng, *Adv. Energy Mater.*, 2016, **6**, 1501661.
13. Y. Li, B. Huang, Y. Sun, M. Luo, Y. Yang, Y. Qin, L. Wang, C. Li, F. Lv, W. Zhang and S. Guo, *Small*, 2019, **15**, 1804212.
